# Supplementary material for: Effectiveness, Cost-Utility, and Safety of Neurofeedback Self-Regulating Training in Patients with Post-Traumatic Stress Disorder: A Randomized Controlled Trial
Source: MDPI journal article supplement (doi:10.3390/healthcare9101351), 2021-10-11
Supplement: s1 [file s1]

## **Supplementary Legends**

### **Supplementary Table 1**

**Mean difference for neurofeedback versus the waitlist control group on the subscale of CSEI-S variables at V1, V8, V16, and V17.**

### **Supplementary Table 2**

**QEEG data**

**2.1 NSRT Group, Closed eye, baseline**

**2.2 Waitlist Control Group, Closed eye, baseline**

**2.3 NSRT Group, opened eye, baseline**

**2.4 Waitlist control Group, opened eye, baseline**

**2.5 NSRT Group, Closed eye, Visit 16**

**2.6 Waitlist Control Group, Closed eye, Visit 16**

**2.7 NSRT Group, opened eye, Visit 16**

**2.8 Waitlist control Group, opened eye, Visit 16**

**Supplementary Table 1.** Mean difference for neurofeedback versus the waitlist control group on the subscale of CSEI-S variables at V1, V8, V16, and V17.

|                            | Neurofeedback group (N=10) | Waitlist control group (N=9) | p-value |
|----------------------------|----------------------------|------------------------------|---------|
| <b>CSEI-S (total)</b>      |                            |                              |         |
| V1 (Baseline)              | 77.90±15.46                | 71.00±19.07                  | .40     |
| V17 (week 12)              | 56.50±12.64                | 68.67±13.12                  |         |
| Difference (V1-V17)        | 21.40±15.02                | 2.33±12.66                   | .13     |
| <b>CSEI-S (joy)</b>        |                            |                              |         |
| V1 (Baseline)              | 9.10±2.92                  | 10.67±3.04                   | .28     |
| V17 (week 12)              | 10.3±3.77                  | 9.67±3.28                    |         |
| Difference (V1-V17)        | -1.20±3.26                 | 1.00±2.60                    | .08     |
| <b>CSEI-S (anger)</b>      |                            |                              |         |
| V1 (Baseline)              | 9.50±3.98                  | 7.56±3.24                    | 1.00    |
| V17 (week 12)              | 6.50±1.65                  | 6.89±2.26                    |         |
| Difference (V1-V17)        | 3.00±2.98                  | 0.67±1.87                    | .05     |
| <b>CSEI-S (thought)</b>    |                            |                              |         |
| V1 (Baseline)              | 13.10±3.03                 | 13.56±2.46                   | .06     |
| V17 (week 12)              | 9.40±2.76                  | 12.89±3.33                   |         |
| Difference (V1-V17)        | 3.70±3.83                  | 0.67±2.55                    | .00*    |
| <b>CSEI-S (depression)</b> |                            |                              |         |
| V1 (Baseline)              | 10.20±2.53                 | 7.78±2.68                    | .28     |
| V17 (week 12)              | 6.70±2.45                  | 8.56±2.96                    |         |
| Difference (V1-V17)        | 3.50±3.72                  | -0.78±2.39                   | .07     |
| <b>CSEI-S (sorrow)</b>     |                            |                              |         |
| V1 (Baseline)              | 12.30±3.59                 | 10.33±4.36                   | .11     |
| V17 (week 12)              | 7.60±2.59                  | 8.78±2.54                    |         |
| Difference (V1-V17)        | 4.70±2.87                  | 1.56±3.57                    | .00*    |
| <b>CSEI-S (fear)</b>       |                            |                              |         |
| V1 (Baseline)              | 12.00±2.79                 | 9.44±4.67                    | .84     |
| V17 (week 12)              | 8.00±3.13                  | 9.56±3.50                    |         |
| Difference (V1-V17)        | 4.00±3.09                  | -0.11±2.03                   | .00*    |
| <b>CSEI-S (fright)</b>     |                            |                              |         |
| V1 (Baseline)              | 11.70±3.95                 | 11.67±5.85                   | .55     |
| V17 (week 12)              | 8.00±4.45                  | 12.33±4.39                   |         |
| Difference (V1-V17)        | 3.70±2.31                  | -0.67±3.32                   | .01*    |

\*, statistically significant (p<0.05)

## Supplementary Table 2 QEEG data

**Supplementary Table 2.1 NSRT Group, Closed eye, baseline**

| Experimental group (Eye Closed) (N=10) |            |             |             |             |           |           |
|----------------------------------------|------------|-------------|-------------|-------------|-----------|-----------|
| Location                               | Delta      | Theta       | Alpha       | Beta        | High Beta | Gamma     |
| FP1-LE                                 | 14.14±7.69 | 7.65±4.03   | 21.46±21.29 | 6.28±3.42   | 1.06±0.57 | 1.57±1.27 |
| FP2-LE                                 | 14.78±8.21 | 8.09±4.39   | 21.66±21.88 | 6.79±4.45   | 1.19±0.99 | 1.52±1.16 |
| F3-LE                                  | 14.06±6.59 | 13.48±9.52  | 31.30±31.20 | 8.77±6.04   | 1.18±0.61 | 1.53±1.25 |
| F4-LE                                  | 14.54±6.69 | 15.23±12.00 | 31.08±29.42 | 9.28±7.06   | 1.16±0.71 | 1.46±0.97 |
| C3-LE                                  | 13.39±7.27 | 15.37±17.57 | 31.37±26.85 | 9.77±6.72   | 1.15±0.73 | 1.12±0.65 |
| C4-LE                                  | 13.03±6.80 | 17.49±24.83 | 29.10±22.52 | 9.90±6.26   | 1.12±0.63 | 1.22±0.75 |
| P3-LE                                  | 12.64±6.93 | 17.48±28.05 | 33.79±29.14 | 12.43±10.27 | 1.02±0.57 | 0.92±0.41 |
| P4-LE                                  | 13.22±7.22 | 17.89±28.98 | 36.28±30.94 | 11.93±8.24  | 1.01±0.49 | 0.92±0.42 |
| O1-LE                                  | 11.77±7.33 | 14.11±21.82 | 40.26±30.33 | 12.25±8.82  | 0.93±0.45 | 0.99±0.48 |
| O2-LE                                  | 11.01±7.20 | 10.89±11.56 | 38.82±33.26 | 11.66±7.60  | 0.93±0.42 | 0.98±0.45 |
| F7-LE                                  | 15.56±7.26 | 6.95±3.34   | 16.88±16.90 | 5.72±3.28   | 0.92±0.60 | 1.22±0.84 |
| F8-LE                                  | 15.28±7.50 | 7.61±4.52   | 15.50±14.75 | 6.16±4.53   | 0.92±0.65 | 1.28±1.03 |
| T3-LE                                  | 9.67±7.66  | 5.87±5.13   | 9.95±7.88   | 5.96±4.86   | 0.91±0.75 | 1.62±1.66 |
| T4-LE                                  | 8.80±7.12  | 6.88±9.23   | 8.97±6.56   | 6.11±6.92   | 1.05±1.32 | 1.63±2.06 |
| T5-LE                                  | 9.51±6.49  | 11.53±17.90 | 24.31±28.16 | 8.33±6.31   | 0.78±0.43 | 0.84±0.45 |
| T6-LE                                  | 11.35±8.36 | 12.07±19.71 | 28.46±20.56 | 8.17±4.97   | 0.86±0.54 | 0.97±0.74 |
| Fz-LE                                  | 15.22±6.63 | 16.25±11.96 | 35.99±35.48 | 9.28±6.14   | 1.13±0.52 | 1.42±1.20 |
| Cz-LE                                  | 15.72±6.52 | 20.27±23.08 | 40.17±34.34 | 10.69±6.77  | 1.18±0.58 | 1.15±0.47 |
| Pz-LE                                  | 14.59±7.02 | 20.52±32.65 | 41.53±36.16 | 12.30±8.84  | 1.03±0.49 | 0.93±0.38 |

**Supplementary Table 2.2 Waitlist Control Group, Closed eye, baseline**

| Waitlist control group (Eye Closed) (N=9) |             |             |             |             |           |            |
|-------------------------------------------|-------------|-------------|-------------|-------------|-----------|------------|
| Location                                  | Delta       | Theta       | Alpha       | Beta        | High Beta | Gamma      |
| FP1-LE                                    | 42.68±66.4  | 13.18±15.48 | 24.04±12.99 | 7.30±2.33   | 1.41±0.84 | 2.02±1.45  |
| FP2-LE                                    | 41.05±61.19 | 12.87±13.41 | 24.53±13.63 | 8.23±3.72   | 1.96±2.00 | 3.09±3.54  |
| F3-LE                                     | 20.10±11.15 | 12.90±4.60  | 33.26±16.58 | 10.60±3.66  | 1.79±0.86 | 2.01±0.82  |
| F4-LE                                     | 19.92±11.26 | 12.95±4.63  | 33.52±19.25 | 10.43±4.10  | 1.67±0.94 | 1.92±0.94  |
| C3-LE                                     | 16.74±6.87  | 11.83±4.59  | 34.89±16.94 | 15.13±9.32  | 2.05±1.06 | 2.24±1.29  |
| C4-LE                                     | 17.50±11.82 | 11.11±4.89  | 34.56±19.79 | 13.58±8.30  | 1.62±0.87 | 1.61±0.56  |
| P3-LE                                     | 15.27±6.04  | 11.31±4.86  | 47.26±40.54 | 17.75±12.42 | 1.61±1.01 | 1.89±1.62  |
| P4-LE                                     | 15.85±8.25  | 11.64±7.00  | 53.28±74.43 | 15.14±8.92  | 1.31±0.64 | 1.39±0.65  |
| O1-LE                                     | 16.27±9.70  | 12.20±6.11  | 73.31±89.56 | 16.20±11.06 | 1.30±0.51 | 1.71±0.88  |
| O2-LE                                     | 12.51±5.90  | 9.86±4.98   | 48.92±66.78 | 12.38±7.09  | 1.21±0.59 | 1.66±1.00  |
| F7-LE                                     | 17.36±13.05 | 7.71±2.91   | 18.33±8.61  | 7.30±3.15   | 1.74±1.52 | 2.47±1.97  |
| F8-LE                                     | 15.25±14.23 | 6.92±3.63   | 16.70±10.26 | 6.00±2.54   | 1.14±0.59 | 1.69±1.16  |
| T3-LE                                     | 9.59±3.63   | 5.63±1.79   | 12.79±4.68  | 9.84±6.73   | 1.99±2.69 | 3.57±5.00  |
| T4-LE                                     | 8.83±4.21   | 5.00±2.53   | 12.04±6.24  | 6.45±2.79   | 1.04±0.61 | 1.74±1.54  |
| T5-LE                                     | 11.31±3.77  | 8.27±3.18   | 30.95±23.11 | 11.87±6.54  | 1.62±1.91 | 2.36±3.44  |
| T6-LE                                     | 14.75±13.91 | 10.48±10.64 | 57.31±90.98 | 12.47±10.99 | 1.30±0.84 | 1.87±1.46  |
| Fz-LE                                     | 23.72±12.92 | 15.83±5.35  | 39.46±20.08 | 15.01±13.82 | 4.07±7.33 | 9.54±23.93 |
| Cz-LE                                     | 19.95±7.85  | 14.63±5.17  | 44.00±24.40 | 13.92±7.66  | 2.32±1.70 | 1.75±0.63  |
| Pz-LE                                     | 17.15±7.62  | 12.95±5.85  | 56.60±49.68 | 16.25±10.24 | 1.45±0.70 | 1.46±0.63  |

**Supplementary Table 2.3 NSRT Group, opened eye, baseline**

| Experimental group (Eye Opened) (N=10) |             |             |             |             |           |           |
|----------------------------------------|-------------|-------------|-------------|-------------|-----------|-----------|
| Location                               | Delta       | Theta       | Alpha       | Beta        | High Beta | Gamma     |
| FP1-LE                                 | 67.67±69.90 | 11.11±6.89  | 9.99±11.56  | 7.10±3.07   | 1.90±0.94 | 2.59±1.61 |
| FP2-LE                                 | 80.30±98.74 | 14.02±14.10 | 10.98±12.49 | 8.67±7.23   | 2.35±2.20 | 3.20±3.27 |
| F3-LE                                  | 22.93±17.49 | 11.62±7.34  | 13.93±16.22 | 7.74±5.32   | 1.65±1.14 | 2.50±2.21 |
| F4-LE                                  | 22.10±15.66 | 13.20±10.08 | 15.29±18.47 | 8.69±7.50   | 1.93±1.93 | 2.89±3.18 |
| C3-LE                                  | 13.82±5.89  | 13.02±15.17 | 15.78±21.65 | 7.45±4.52   | 1.14±0.57 | 1.35±0.86 |
| C4-LE                                  | 13.41±5.14  | 14.83±20.45 | 16.34±21.45 | 7.98±4.17   | 1.22±0.52 | 1.64±1.15 |
| P3-LE                                  | 12.00±3.94  | 14.33±21.30 | 20.92±31.28 | 8.75±7.03   | 0.93±0.41 | 0.97±0.34 |
| P4-LE                                  | 12.45±5.01  | 13.56±19.05 | 22.19±33.50 | 8.57±5.54   | 0.93±0.35 | 1.04±0.39 |
| O1-LE                                  | 10.92±4.03  | 10.32±12.56 | 25.50±48.05 | 8.39±5.47   | 0.88±0.30 | 1.06±0.39 |
| O2-LE                                  | 10.05±3.14  | 7.86±6.26   | 17.32±26.01 | 7.63±4.33   | 0.80±0.27 | 0.96±0.39 |
| F7-LE                                  | 22.81±16.59 | 6.53±2.30   | 7.03±7.74   | 7.64±8.60   | 2.51±3.93 | 3.86±5.90 |
| F8-LE                                  | 25.24±21.90 | 8.00±4.41   | 8.02±8.60   | 13.57±13.29 | 5.17±5.90 | 7.65±8.43 |
| T3-LE                                  | 9.12±5.65   | 5.24±4.48   | 5.80±6.24   | 6.93±5.27   | 1.73±1.54 | 3.21±3.07 |
| T4-LE                                  | 8.43±3.65   | 6.38±8.37   | 6.32±7.27   | 7.29±4.44   | 1.70±1.13 | 3.18±2.21 |
| T5-LE                                  | 8.49±3.77   | 8.85±12.84  | 15.02±21.69 | 6.70±5.06   | 0.91±0.54 | 1.22±0.78 |
| T6-LE                                  | 10.51±6.03  | 9.01±12.23  | 27.46±61.13 | 7.78±6.39   | 1.16±1.05 | 1.74±1.98 |
| Fz-LE                                  | 23.78±17.01 | 13.76±9.18  | 16.76±19.58 | 7.04±4.01   | 1.13±0.49 | 1.55±1.36 |
| Cz-LE                                  | 16.08±5.83  | 16.97±19.24 | 20.97±29.10 | 7.68±4.35   | 1.04±0.33 | 1.19±0.52 |
| Pz-LE                                  | 13.47±4.70  | 15.58±20.88 | 22.86±35.40 | 8.50±5.05   | 0.97±0.29 | 1.12±0.47 |

**Supplementary Table 2.4 Waitlist control Group, opened eye, baseline**

| Waitlist control group (Eye Closed) (N=9) |              |              |           |             |             |             |
|-------------------------------------------|--------------|--------------|-----------|-------------|-------------|-------------|
| Location                                  | Delta        | Theta        | Alpha     | Beta        | High Beta   | Gamma       |
| FP1-LE                                    | 378.51±739.6 | 50.84105±.47 | 9.02±8.60 | 18.30±24.46 | 15.02±29.97 | 11.05±15.16 |
| FP2-LE                                    | 359.98±726.1 | 48.66±103.29 | 8.87±8.12 | 21.78±28.73 | 16.96±36.09 | 14.45±20.59 |
| F3-LE                                     | 51.99±72.71  | 13.27±11.6   | 7.41±4.32 | 9.50±4.60   | 3.09±2.67   | 2.78±1.71   |
| F4-LE                                     | 50.54±76.71  | 13.02±12.7   | 7.28±4.21 | 10.78±7.28  | 4.06±5.54   | 3.55±3.35   |
| C3-LE                                     | 21.89±16.03  | 8.68±4.14    | 8.14±5.34 | 10.87±6.72  | 1.97±1.00   | 2.01±0.77   |
| C4-LE                                     | 20.94±15.92  | 7.82±3.85    | 7.93±5.47 | 10.20±6.10  | 1.85±0.87   | 1.67±0.55   |
| P3-LE                                     | 15.43±7.13   | 6.87±2.70    | 9.03±7.49 | 10.88±6.78  | 1.47±0.74   | 1.78±1.37   |
| P4-LE                                     | 15.70±6.97   | 6.35±2.41    | 8.19±7.26 | 8.98±4.20   | 1.12±0.44   | 1.16±0.42   |
| O1-LE                                     | 13.29±5.62   | 5.56±1.72    | 8.50±6.66 | 8.61±4.46   | 1.09±0.39   | 1.53±0.89   |
| O2-LE                                     | 12.88±6.15   | 5.07±1.52    | 6.37±4.29 | 7.46±3.66   | 1.02±0.56   | 1.50±1.12   |
| F7-LE                                     | 57.47±76.05  | 10.23±10.4   | 4.51±2.22 | 8.14±3.97   | 3.04±2.56   | 4.12±3.67   |
| F8-LE                                     | 41.64±62.32  | 7.61±8.26    | 4.02±2.51 | 9.00±4.52   | 3.48±2.60   | 4.58±3.08   |
| T3-LE                                     | 14.16±11.67  | 4.67±2.45    | 4.39±2.18 | 11.06±7.11  | 3.15±2.89   | 5.40±5.42   |
| T4-LE                                     | 12.77±10.60  | 3.77±1.99    | 3.48±2.61 | 6.74±2.09   | 1.64±0.59   | 2.92±1.47   |
| T5-LE                                     | 11.33±6.07   | 4.74±1.85    | 5.89±3.61 | 8.14±4.05   | 1.40±0.94   | 2.17±2.04   |
| T6-LE                                     | 11.43±6.37   | 4.01±1.98    | 7.01±8.02 | 7.33±3.71   | 1.27±0.72   | 2.16±1.67   |
| Fz-LE                                     | 63.14±88.60  | 15.8714.±2   | 9.58±6.89 | 11.42±9.93  | 3.61±4.51   | 6.63±14.76  |
| Cz-LE                                     | 23.48±13.15  | 10.28±4.33   | 8.80±6.05 | 10.33±6.66  | 2.34±1.88   | 1.58±0.58   |
| Pz-LE                                     | 17.30±7.25   | 7.62±2.81    | 9.08±6.97 | 10.12±5.89  | 1.26±0.58   | 1.19±0.39   |

**Supplementary Table 2.5 NSRT Group, Closed eye, Visit 16**

| Experimental group (Eye Closed) (N=10) |                |                 |                 |                 |               |               |
|----------------------------------------|----------------|-----------------|-----------------|-----------------|---------------|---------------|
| Location                               | Delta          | Theta           | Alpha           | Beta            | High Beta     | Gamma         |
| FP1-LE                                 | 14.143254±7.69 | 7.647461±4.0331 | 21.461333±21.28 | 6.280375±3.4238 | 1.06401±0.569 | 1.573161±1.26 |
|                                        | 2405           | 85              | 6363            | 44              | 747           | 5446          |
| FP2-LE                                 | 14.78042±8.207 | 8.089589±4.3883 | 21.656886±21.87 | 6.789822±4.4484 | 1.186407±0.99 | 1.523869±1.16 |
|                                        | 477            | 7               | 7735            | 66              | 0748          | 1988          |
| F3-LE                                  | 14.058005±6.59 | 13.475446±9.521 | 31.299559±31.20 | 8.771515±6.0441 | 1.17511±0.610 | 1.529598±1.24 |
|                                        | 2148           | 705             | 4813            | 88              | 525           | 9027          |
| F4-LE                                  | 14.535566±6.68 | 15.231811±12.00 | 31.075507±29.41 | 9.277463±7.0615 | 1.155392±0.71 | 1.460545±0.97 |
|                                        | 9705           | 1828            | 8427            | 21              | 2943          | 2993          |
| C3-LE                                  | 13.389863±7.26 | 15.368206±17.57 | 31.370076±26.85 | 9.769476±6.7241 | 1.146058±0.73 | 1.115654±0.65 |
|                                        | 9929           | 0384            | 3826            | 88              | 1198          | 0268          |
| C4-LE                                  | 13.027781±6.79 | 17.491002±24.82 | 29.104238±22.51 | 9.898576±6.2640 | 1.119094±0.62 | 1.22095±0.750 |
|                                        | 7019           | 5238            | 5262            | 99              | 9846          | 827           |
| P3-LE                                  | 12.640061±6.92 | 17.475121±28.04 | 33.788048±29.13 | 12.430633±10.26 | 1.020541±0.57 | 0.917509±0.40 |
|                                        | 8852           | 6903            | 9672            | 5592            | 0405          | 7397          |
| P4-LE                                  | 13.216132±7.21 | 17.894218±28.98 | 36.275456±30.93 | 11.928131±8.240 | 1.014194±0.48 | 0.922387±0.41 |
|                                        | 5181           | 4659            | 7446            | 38              | 7305          | 7761          |
| O1-LE                                  | 11.767668±7.33 | 14.108324±21.81 | 40.25791±30.326 | 12.245019±8.815 | 0.934414±0.44 | 0.986943±0.47 |
|                                        | 3738           | 8722            | 026             | 199             | 642           | 7506          |
| O2-LE                                  | 11.005752±7.19 | 10.885413±11.56 | 38.821653±33.26 | 11.66206±7.5976 | 0.930911±0.41 | 0.979422±0.44 |
|                                        | 6534           | 0595            | 1811            | 13              | 636           | 6212          |
| F7-LE                                  | 15.5599±7.2583 | 6.953004±3.3386 | 16.882362±16.90 | 5.719545±3.2813 | 0.921099±0.60 | 1.22253±0.836 |
|                                        | 79             | 88              | 1374            | 35              | 2749          | 398           |
| F8-LE                                  | 15.277057±7.49 | 7.613268±4.5172 | 15.50405±14.752 | 6.158567±4.5315 | 0.923049±0.64 | 1.282693±1.02 |
|                                        | 7799           | 91              | 088             | 28              | 6631          | 8677          |
| T3-LE                                  | 9.673874±7.656 | 5.865432±5.1309 | 9.951291±7.8755 | 5.957528±4.8631 | 0.912807±0.75 | 1.616753±1.66 |
|                                        | 003            | 49              | 92              | 25              | 3728          | 2436          |

|       |                |                 |                 |                 |               |               |
|-------|----------------|-----------------|-----------------|-----------------|---------------|---------------|
| T4-LE | 8.795455±7.115 | 6.875573±9.2256 | 8.972572±6.5625 | 6.114702±6.9220 | 1.04987±1.318 | 1.629675±2.05 |
|       | 217            | 7               | 75              | 79              | 796           | 8621          |
| T5-LE | 9.512484±6.486 | 11.530563±17.90 | 24.306048±28.16 | 8.329332±6.3139 | 0.775075±0.42 | 0.838305±0.44 |
|       | 641            | 1581            | 0051            | 17              | 6583          | 8368          |
| T6-LE | 11.352086±8.35 | 12.073296±19.71 | 28.464701±20.55 | 8.171724±4.9676 | 0.855321±0.53 | 0.971888±0.73 |
|       | 616            | 3624            | 7428            | 09              | 6688          | 6305          |
| Fz-LE | 15.216273±6.63 | 16.252513±11.95 | 35.993783±35.48 | 9.276158±6.1373 | 1.129914±0.51 | 1.418095±1.20 |
|       | 3855           | 6773            | 215             | 18              | 8791          | 066           |
| Cz-LE | 15.715401±6.51 | 20.270204±23.08 | 40.171778±34.33 | 10.694242±6.769 | 1.176072±0.57 | 1.151774±0.47 |
|       | 7431           | 0187            | 9971            | 975             | 7805          | 2839          |
| Pz-LE | 14.593658±7.01 | 20.523245±32.65 | 41.52671±36.155 | 12.302733±8.836 | 1.025138±0.49 | 0.934088±0.38 |
|       | 8339           | 1293            | 004             | 563             | 1959          | 068           |

---



**Supplementary Table 2.6 Waitlist Control Group, Closed eye, Visit 16**

| Waitlist control group (Eye Closed) (N=9) |                         |                         |                         |                         |                       |                       |
|-------------------------------------------|-------------------------|-------------------------|-------------------------|-------------------------|-----------------------|-----------------------|
| Location                                  | Delta                   | Theta                   | Alpha                   | Beta                    | High Beta             | Gamma                 |
| FP1-LE                                    | 42.68077±66.39<br>6202  | 13.176747±15.4<br>80345 | 24.044859±12.9<br>91065 | 7.299208±2.332<br>897   | 1.406141±0.83<br>8723 | 2.018812±1.454<br>289 |
| FP2-LE                                    | 41.053343±61.1<br>87979 | 12.870472±13.4<br>14529 | 24.529713±13.6<br>29342 | 8.228693±3.722<br>595   | 1.957218±1.99<br>8877 | 3.086162±3.543<br>882 |
| F3-LE                                     | 20.101663±11.1<br>50507 | 12.904124±4.60<br>3694  | 33.260215±16.5<br>81739 | 10.596744±3.65<br>6891  | 1.786061±0.86<br>3761 | 2.008931±0.819<br>456 |
| F4-LE                                     | 19.918445±11.2<br>61126 | 12.9541±4.6301<br>88    | 33.520165±19.2<br>465   | 10.42578±4.099<br>775   | 1.669689±0.93<br>8261 | 1.918408±0.942<br>363 |
| C3-LE                                     | 16.735072±6.87<br>4776  | 11.827963±4.59<br>3787  | 34.887917±16.9<br>43381 | 15.132164±9.32<br>101   | 2.054203±1.05<br>867  | 2.243535±1.285<br>303 |
| C4-LE                                     | 17.49716±11.81<br>7659  | 11.112477±4.89<br>2245  | 34.562484±19.7<br>91778 | 13.577702±8.30<br>0759  | 1.622731±0.86<br>7067 | 1.611808±0.555<br>601 |
| P3-LE                                     | 15.269344±6.04<br>1211  | 11.310569±4.86<br>1279  | 47.260302±40.5<br>36154 | 17.747979±12.4<br>19991 | 1.605455±1.01<br>117  | 1.888899±1.619<br>933 |
| P4-LE                                     | 15.847872±8.24<br>6194  | 11.644967±6.99<br>8125  | 53.278308±74.4<br>30707 | 15.143563±8.92<br>016   | 1.312326±0.64<br>3678 | 1.392201±0.646<br>645 |
| O1-LE                                     | 16.272968±9.70<br>3296  | 12.196385±6.11<br>0851  | 73.310359±89.5<br>64735 | 16.202237±11.0<br>57471 | 1.297266±0.51<br>0836 | 1.711083±0.881<br>562 |
| O2-LE                                     | 12.514064±5.89<br>6314  | 9.861395±4.976<br>425   | 48.920582±66.7<br>82091 | 12.376059±7.08<br>6631  | 1.212282±0.58<br>7154 | 1.663855±1.001<br>59  |
| F7-LE                                     | 17.358618±13.0<br>47762 | 7.710269±2.905<br>499   | 18.329749±8.61<br>302   | 7.303801±3.151<br>014   | 1.738281±1.51<br>8547 | 2.470329±1.971<br>066 |
| F8-LE                                     | 15.253606±14.2<br>34546 | 6.915335±3.632<br>58    | 16.701751±10.2<br>64048 | 6.004828±2.543<br>338   | 1.140141±0.59<br>3249 | 1.692726±1.164<br>504 |
| T3-LE                                     | 9.591431±3.633<br>702   | 5.625215±1.785<br>191   | 12.790684±4.67<br>9947  | 9.837426±6.733<br>61    | 1.985643±2.68<br>7594 | 3.572082±4.997<br>22  |
| T4-LE                                     | 8.825034±4.209<br>547   | 5.003304±2.534<br>971   | 12.039768±6.24<br>4243  | 6.446952±2.788<br>194   | 1.037169±0.60<br>9449 | 1.744596±1.539<br>61  |
| T5-LE                                     | 11.3084±3.7694<br>15    | 8.267293±3.183<br>905   | 30.947115±23.1<br>05584 | 11.874104±6.53<br>7966  | 1.617618±1.90<br>7912 | 2.356744±3.437<br>156 |
| T6-LE                                     | 14.752079±13.9<br>05319 | 10.479514±10.6<br>37453 | 57.314105±90.9<br>76387 | 12.470161±10.9<br>93075 | 1.296644±0.83<br>6194 | 1.867987±1.462<br>588 |

|       |                |                |                |                |               |                |
|-------|----------------|----------------|----------------|----------------|---------------|----------------|
| Fz-LE | 23.721336±12.9 | 15.829301±5.35 | 39.462754±20.0 | 15.010775±13.8 | 4.073441±7.32 | 9.538058±23.92 |
|       | 17721          | 0104           | 76507          | 22975          | 55            | 9113           |
| Cz-LE | 19.954127±7.85 | 14.628703±5.16 | 43.995108±24.4 | 13.919201±7.66 | 2.319423±1.70 | 1.747588±0.628 |
|       | 2769           | 857            | 00329          | 0237           | 1389          | 986            |
| Pz-LE | 17.151061±7.62 | 12.94746±5.848 | 56.596466±49.6 | 16.245701±10.2 | 1.446558±0.70 | 1.456646±0.629 |
|       | 1182           | 455            | 79606          | 39442          | 3419          | 492            |

---

**Supplementary Table 2.7 NSRT Group, opened eye, Visit 16**

| Experimental group (Eye Opened) (N=10) |                         |                         |                         |                         |                       |                       |
|----------------------------------------|-------------------------|-------------------------|-------------------------|-------------------------|-----------------------|-----------------------|
| Location                               | Delta                   | Theta                   | Alpha                   | Beta                    | High Beta             | Gamma                 |
| FP1-LE                                 | 67.667188±69.8<br>96492 | 11.105061±6.89<br>2343  | 9.988715±11.55<br>9862  | 7.099866±3.070<br>912   | 1.899822±0.93<br>9023 | 2.593407±1.60<br>9611 |
| FP2-LE                                 | 80.302348±98.7<br>39139 | 14.016985±14.1<br>04645 | 10.975956±12.4<br>88202 | 8.67346±7.2297<br>06    | 2.348317±2.19<br>6994 | 3.203296±3.27<br>1395 |
| F3-LE                                  | 22.929765±17.4<br>87964 | 11.622796±7.34<br>0645  | 13.930605±16.2<br>22845 | 7.744116±5.318<br>556   | 1.651873±1.14<br>0994 | 2.504229±2.20<br>6739 |
| F4-LE                                  | 22.102671±15.6<br>57462 | 13.195824±10.0<br>80484 | 15.291787±18.4<br>68606 | 8.685341±7.497<br>954   | 1.928241±1.92<br>7516 | 2.888176±3.18<br>1678 |
| C3-LE                                  | 13.823187±5.88<br>5124  | 13.019836±15.1<br>69719 | 15.777462±21.6<br>5402  | 7.454725±4.521<br>88    | 1.144299±0.57<br>2627 | 1.347584±0.86<br>2053 |
| C4-LE                                  | 13.412077±5.14<br>3729  | 14.830806±20.4<br>4789  | 16.344499±21.4<br>5215  | 7.979513±4.168<br>394   | 1.217816±0.52<br>1156 | 1.642514±1.14<br>5664 |
| P3-LE                                  | 12.004564±3.93<br>623   | 14.33466±21.29<br>8071  | 20.920625±31.2<br>77379 | 8.753156±7.027<br>564   | 0.92967±0.405<br>375  | 0.96693±0.339<br>639  |
| P4-LE                                  | 12.446448±5.01<br>3135  | 13.560013±19.0<br>46437 | 22.191835±33.4<br>95377 | 8.56592±5.5356<br>03    | 0.929513±0.35<br>372  | 1.03981±0.391<br>265  |
| O1-LE                                  | 10.918744±4.02<br>9207  | 10.323832±12.5<br>5967  | 25.502155±48.0<br>50308 | 8.386282±5.471<br>353   | 0.884686±0.30<br>1907 | 1.059132±0.39<br>2212 |
| O2-LE                                  | 10.050416±3.14<br>4292  | 7.855185±6.260<br>103   | 17.319887±26.0<br>05874 | 7.628314±4.325<br>62    | 0.80438±0.268<br>349  | 0.964278±0.39<br>0377 |
| F7-LE                                  | 22.812953±16.5<br>89467 | 6.528101±2.301<br>972   | 7.033651±7.744<br>089   | 7.639085±8.601<br>888   | 2.512193±3.93<br>1169 | 3.857467±5.89<br>7731 |
| F8-LE                                  | 25.24142±21.90<br>0256  | 7.997105±4.411<br>628   | 8.017598±8.596<br>382   | 13.572245±13.2<br>92096 | 5.173039±5.90<br>0094 | 7.652979±8.43<br>3909 |
| T3-LE                                  | 9.122977±5.648<br>129   | 5.238777±4.479<br>539   | 5.804368±6.238<br>938   | 6.927615±5.269<br>607   | 1.734207±1.54<br>2959 | 3.208118±3.06<br>8016 |
| T4-LE                                  | 8.426471±3.646<br>162   | 6.377716±8.372<br>612   | 6.31524±7.2728<br>02    | 7.291579±4.435<br>209   | 1.70235±1.134<br>82   | 3.183967±2.20<br>7417 |
| T5-LE                                  | 8.486402±3.767<br>393   | 8.847824±12.83<br>7479  | 15.019414±21.6<br>9344  | 6.703965±5.060<br>42    | 0.913991±0.53<br>8064 | 1.215284±0.77<br>747  |
| T6-LE                                  | 10.508771±6.03<br>1825  | 9.005591±12.23<br>4486  | 27.459838±61.1<br>26461 | 7.77575±6.3938<br>38    | 1.156266±1.04<br>8976 | 1.739427±1.97<br>7204 |
| Fz-LE                                  | 23.783079±17.0          | 13.75985±9.175          | 16.764854±19.5          | 7.035336±4.005          | 1.13479±0.491         | 1.553695±1.36         |

|       |                |                |                |                |               |               |
|-------|----------------|----------------|----------------|----------------|---------------|---------------|
|       | 13617          | 025            | 75683          | 872            | 632           | 4817          |
| Cz-LE | 16.084806±5.83 | 16.965102±19.2 | 20.969888±29.1 | 7.677437±4.354 | 1.04415±0.332 | 1.194184±0.51 |
|       | 231            | 44433          | 02495          | 867            | 462           | 92            |
| Pz-LE | 13.47006±4.702 | 15.577053±20.8 | 22.864585±35.3 | 8.503187±5.050 | 0.968693±0.29 | 1.1172±0.4677 |
|       | 239            | 81457          | 95668          | 189            | 0985          | 16            |

---

**Supplementary Table 2.8 Waitlist control Group, opened eye, Visit 16**

| Waitlist control group (Eye Closed) (N=9) |                           |                          |                       |                         |                         |                         |
|-------------------------------------------|---------------------------|--------------------------|-----------------------|-------------------------|-------------------------|-------------------------|
| Location                                  | Delta                     | Theta                    | Alpha                 | Beta                    | High Beta               | Gamma                   |
| FP1-LE                                    | 378.51265739.614<br>949   | 50.842327±105.4<br>71691 | 9.017066±8.5<br>97391 | 18.295832±24.4<br>56834 | 15.022915±29.9<br>71044 | 11.045628±15.1<br>62322 |
| FP2-LE                                    | 359.984763±726.<br>130249 | 48.663666±103.2<br>87554 | 8.867182±8.1<br>20998 | 21.782814±28.7<br>30153 | 16.956178±36.0<br>88097 | 14.453732±20.5<br>91999 |
| F3-LE                                     | 51.9888±72.7120<br>51     | 13.274419±11.62<br>4474  | 7.405104±4.3<br>24663 | 9.502839±4.603<br>52    | 3.094315±2.669<br>213   | 2.780208±1.714<br>866   |
| F4-LE                                     | 50.538231±76.71<br>1346   | 13.021347±12.78<br>7776  | 7.284114±4.2<br>09328 | 10.776677±7.27<br>664   | 4.060197±5.542<br>679   | 3.549131±3.347<br>651   |
| C3-LE                                     | 21.887468±16.02<br>9269   | 8.676014±4.1427<br>63    | 8.138709±5.3<br>42414 | 10.867874±6.71<br>5508  | 1.974768±1.001<br>918   | 2.01078±0.7733<br>94    |
| C4-LE                                     | 20.939826±15.92<br>3635   | 7.82266±3.85076<br>9     | 7.931861±5.4<br>72182 | 10.1962±6.1016<br>97    | 1.847572±0.872<br>964   | 1.665161±0.552<br>085   |
| P3-LE                                     | 15.427389±7.132<br>993    | 6.873768±2.6950<br>24    | 9.031838±7.4<br>87115 | 10.883829±6.77<br>9629  | 1.468503±0.741<br>97    | 1.782825±1.365<br>533   |
| P4-LE                                     | 15.704309±6.971<br>566    | 6.349259±2.4091<br>44    | 8.193747±7.2<br>55171 | 8.980488±4.199<br>833   | 1.115875±0.438<br>029   | 1.156959±0.419<br>042   |
| O1-LE                                     | 13.293722±5.620<br>097    | 5.556133±1.7211<br>59    | 8.502626±6.6<br>64789 | 8.613849±4.455<br>926   | 1.088222±0.389<br>503   | 1.532643±0.887<br>539   |
| O2-LE                                     | 12.881062±6.149<br>537    | 5.073612±1.5156<br>45    | 6.373816±4.2<br>93838 | 7.456414±3.659<br>022   | 1.023263±0.563<br>286   | 1.499541±1.123<br>218   |
| F7-LE                                     | 57.467811±76.05<br>3043   | 10.233943±10.45<br>9405  | 4.507176±2.2<br>15836 | 8.136598±3.973<br>032   | 3.036686±2.557<br>668   | 4.115348±3.671<br>166   |
| F8-LE                                     | 41.643661±62.31<br>593    | 7.609133±8.2638<br>82    | 4.022697±2.5<br>13708 | 8.999085±4.521<br>373   | 3.48247±2.5953<br>95    | 4.575198±3.083<br>538   |
| T3-LE                                     | 14.16282±11.673<br>102    | 4.670837±2.4491<br>22    | 4.393942±2.1<br>7714  | 11.063849±7.11<br>2388  | 3.148046±2.892<br>84    | 5.397376±5.415<br>934   |
| T4-LE                                     | 12.769229±10.59<br>7867   | 3.769361±1.9907<br>73    | 3.477954±2.6<br>07726 | 6.740608±2.090<br>13    | 1.638882±0.591<br>467   | 2.924431±1.469<br>582   |
| T5-LE                                     | 11.326289±6.067<br>047    | 4.743204±1.8473<br>16    | 5.893874±3.6<br>11945 | 8.138483±4.046<br>81    | 1.395443±0.942<br>892   | 2.171807±2.042<br>922   |
| T6-LE                                     | 11.426256±6.371<br>77     | 4.014527±1.9754<br>73    | 7.005055±8.0<br>17455 | 7.326432±3.712<br>027   | 1.268313±0.716<br>182   | 2.158316±1.666<br>762   |
| Fz-LE                                     | 63.143169±88.60           | 15.871702±14.24          | 9.582886±6.8          | 11.419657±9.92          | 3.609416±4.506          | 6.630704±14.75          |

|       |                 |                 |              |                |                |                |
|-------|-----------------|-----------------|--------------|----------------|----------------|----------------|
|       | 0936            | 6265            | 93323        | 8002           | 569            | 8339           |
| Cz-LE | 23.484641±13.15 | 10.281423±4.333 | 8.801915±6.0 | 10.325832±6.65 | 2.339882±1.878 | 1.577593±0.579 |
|       | 2662            | 497             | 49975        | 5894           | 608            | 112            |
| Pz-LE | 17.304222±7.251 | 7.618804±2.8137 | 9.083776±6.9 | 10.115552±5.88 | 1.264182±0.578 | 1.194712±0.387 |
|       | 098             | 01              | 71124        | 604            | 169            | 113            |

---
